# Supplementary material
Source: Springer Nature journal article supplement (https://www.springermedizin.de/resource/supplementary/12889_2012_5122_MOESM1_ESM.pdf/9496672)
Supplement: MOESM1 [file 9496672]

Table 1: Socio-demographic Characteristics of respondents, Bahir Dar Zuria district, May 2012  
(n=608).

| <b>Variable</b>                                         | <b>Frequency</b> | <b>Percent</b> |
|---------------------------------------------------------|------------------|----------------|
| <b>Family size:</b>                                     |                  |                |
| =>5                                                     | 479              | 78.8           |
| <5                                                      | 129              | 21.2           |
| <b>Marital status:</b>                                  |                  |                |
| Married                                                 | 539              | 88.7           |
| Divorce                                                 | 38               | 6.2            |
| Widowed                                                 | 31               | 5.1            |
| <b>Head of household:</b>                               |                  |                |
| Father                                                  | 539              | 88.7           |
| Mother                                                  | 69               | 11.3           |
| <b>Father occupation:</b>                               |                  |                |
| Farmer                                                  | 526              | 97.6           |
| Daily Labor                                             | 13               | 2.4            |
| <b>Father education:</b>                                |                  |                |
| Not read and write                                      | 497              | 92.2           |
| Literate                                                | 42               | 7.8            |
| <b>Mother occupation:</b>                               |                  | 95.2           |
| House wife                                              | 579              | 4.8            |
| Sell drinks                                             | 29               |                |
| <b>Mother education:</b>                                |                  |                |
| Not read and write                                      | 585              | 96.2           |
| Literate                                                | 23               | 3.8            |
| <b>HHs having primary or secondary school children:</b> |                  | 41.8           |
| Not educated                                            | 254              | 58.2           |
| Primary school and above                                | 354              |                |
| <b>Income:</b>                                          |                  |                |
| <5000 Et. birr per year                                 | 167              | 27.5           |
| =>5000 Et. birr per year                                | 441              | 72.5           |
